# Supplementary material for: Modelling the Reallocation of Time Spent Sitting into Physical Activity: Isotemporal Substitution vs. Compositional Isotemporal Substitution
Source: MDPI journal article supplement (doi:10.3390/ijerph18126210), 2021-06-08
Supplement: s1 [file s1]

**Supplementary Table S1.** The associations of reallocating time spent sitting with standing and with stepping.

|                                    | Compositional isotemporal substitution |                             |
|------------------------------------|----------------------------------------|-----------------------------|
|                                    | Sitting to Standing                    | Sitting to Stepping         |
| BMI                                | <b>-0.05 (-0.08; -0.02)</b>            | <b>-0.33 (-0.40; -0.27)</b> |
| Waist circumference                | <b>-0.07 (-0.10; -0.04)</b>            | <b>-0.30 (-0.36; -0.23)</b> |
| Cholesterol                        | -0.01 (-0.04; 0.02)                    | 0.03 (-0.03; 0.10)          |
| HDL Cholesterol                    | <b>0.05 (0.01; 0.08)</b>               | <b>0.17 (0.10; 0.23)</b>    |
| LDL Cholesterol                    | -0.01 (-0.05; 0.02)                    | 0.03 (-0.04; 0.09)          |
| Triglycerides                      | <b>-0.06 (-0.09; -0.03)</b>            | <b>-0.17 (-0.24; -0.10)</b> |
| HbA1c                              | 0.02 (-0.01; 0.06)                     | 0.00 (-0.07; 0.07)          |
| CMR Risk Score                     | <b>-0.03 (-0.05; -0.01)</b>            | <b>-0.13 (0.17; -0.10)</b>  |
| CMR Risk Score (without adiposity) | <b>-0.02 (-0.04; 0.00)</b>             | <b>-0.09 (-0.12; -0.05)</b> |
|                                    | Traditional isotemporal substitution   |                             |
|                                    | Sitting to Standing                    | Sitting to Stepping         |
| BMI                                | <b>-0.07 (-0.11; -0.04)</b>            | <b>-0.38 (-0.46; -0.30)</b> |
| Waist circumference                | <b>-0.08 (-0.12; -0.05)</b>            | <b>-0.35 (-0.43; -0.27)</b> |
| Cholesterol                        | -0.01 (-0.05; -0.02)                   | 0.04 (-0.04; 0.12)          |
| HDL Cholesterol                    | <b>0.05 (0.01; 0.08)</b>               | <b>0.21 (0.13; 0.29)</b>    |
| LDL Cholesterol                    | -0.01 (-0.04; 0.02)                    | 0.02 (-0.06; 0.10)          |
| Triglycerides                      | <b>-0.06 (-0.10; -0.03)</b>            | <b>-0.20 (-0.29; -0.12)</b> |
| HbA1c                              | 0.02 (-0.02; 0.06)                     | 0.00 (-0.09; 0.08)          |
| CMR Risk Score                     | <b>-0.03 (-0.05; -0.02)</b>            | <b>-0.16 (-0.21; -0.12)</b> |
| CMR Risk Score (without adiposity) | <b>-0.02 (-0.04; 0.00)</b>             | <b>-0.11 (-0.16; -0.07)</b> |

\* All variables used in the analyses have been standardised by calculating z scores. Bold values represent significant associations set at an alpha of  $\leq 0.05$ .
